# Supplementary material
Source: publisher figshare collection journal article supplement (https://acs.figshare.com/ndownloader/files/3944569)
Supplement: Supplementary file 1 [file 3944569]

# **Supporting Information**

## **Surface Modification of MnFe<sub>2</sub>O<sub>4</sub> Nanoparticles to Impart Intrinsic Multiple Fluorescence and Novel Photocatalytic Properties**

Monalisa Pal,\* Rupali Rakshit and Kalyan Mandal

*Department of Condensed Matter Physics and Material Sciences, S. N. Bose National Centre for  
Basic Sciences, Block JD, Sector III, Salt Lake, Kolkata 700 098, India*

\*Corresponding Authors Email: [monalisa12@bose.res.in](mailto:monalisa12@bose.res.in)

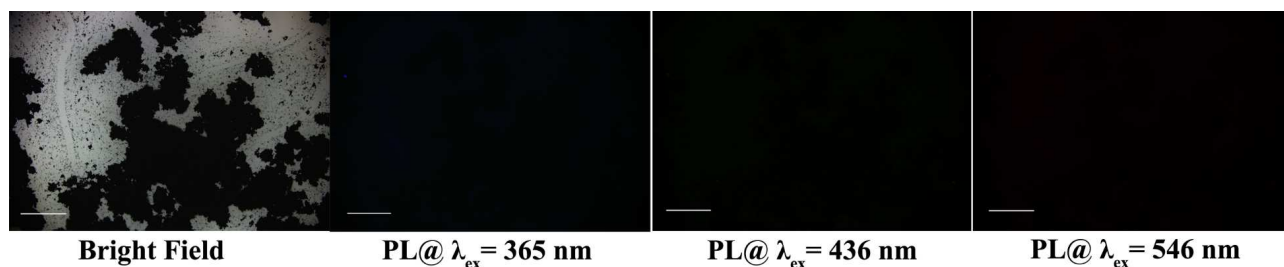

**Figure S1** Fluorescence micrographs of bare  $\text{MnFe}_2\text{O}_4$  NPs under bright field, UV, blue and green light. The scale bars in all the images are 500  $\mu\text{m}$ .

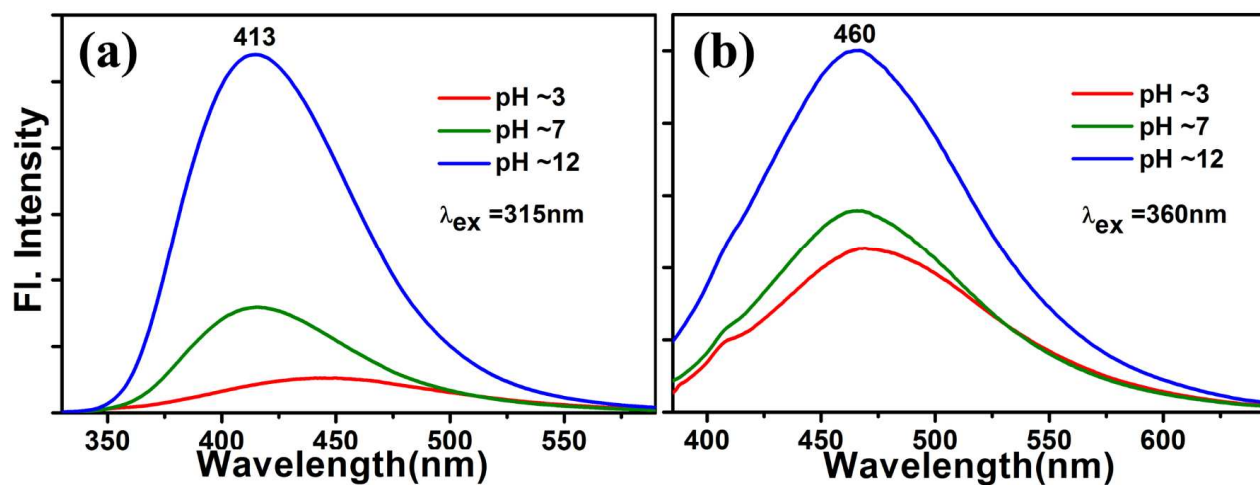

**Figure S2** (a) and (b) show the decrease of fluorescence intensity at emission maxima of T- $\text{MnFe}_2\text{O}_4$  NPs at 413 and 460 nm upon excitation at 315 and 360 nm respectively with decrease in pH of the system upon addition of hydrochloric acid (HCl).
